# Supplementary material for: 6-OHDA-Induced Changes in Colonic Segment Contractility in the Rat Model of Parkinson’s Disease
Source: Hindawi journal article supplement (doi:10.1155/2023/9090524), 2023-01-27

# Experimental design and time-line

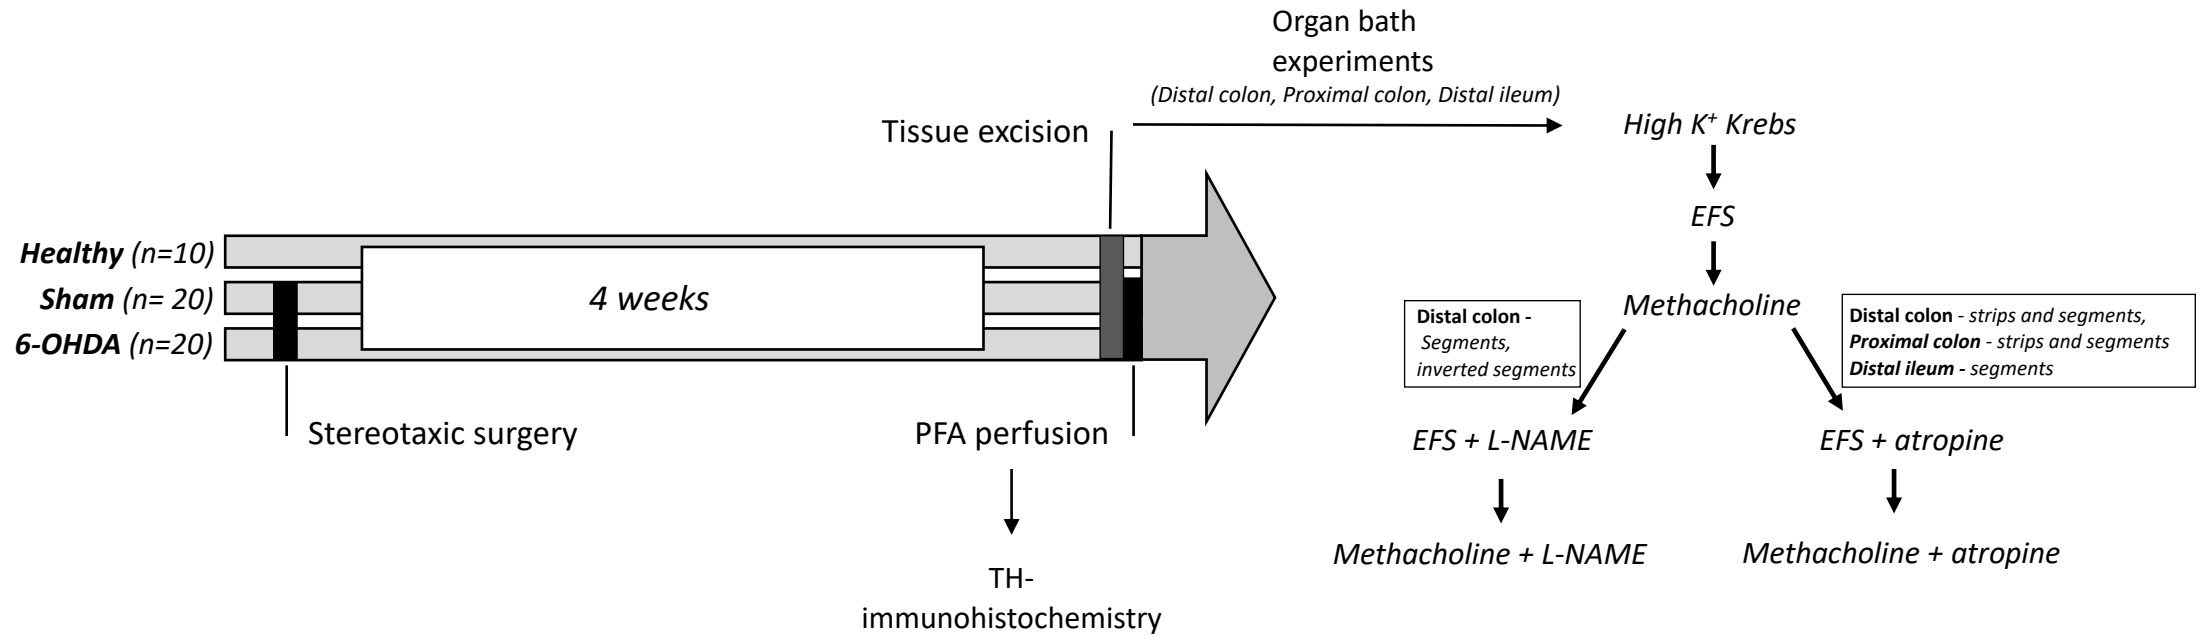

Supplement: f1 [file 9090524.f1.pdf]
